# Supplementary material
Source: PubMed Central journal article supplement (PMC8086241)
Supplement: web_material_kwaa067.pdf [file web_material_kwaa067.pdf]

**WEB MATERIAL****E-CIGARETTES AND FECUNDABILITY: RESULTS FROM A PROSPECTIVE  
PRECONCEPTION COHORT STUDY**

Alyssa F. Harlow, Elizabeth E. Hatch, Amelia K. Wesselink, Kenneth J. Rothman, and Lauren  
A. Wise

## Table of contents:

|                   |       |
|-------------------|-------|
| Web Table 1 ..... | pg. 2 |
| Web Table 2 ..... | pg. 3 |
| Web Table 3 ..... | pg. 4 |
| Web Table 4 ..... | pg. 5 |
| Web Table 5 ..... | pg. 6 |

**Web Table 1. Fecundability Ratios by Time-Varying Current, Former and Never E-Cigarette Use and Cigarette Smoking, Pregnancy Study Online, United States and Canada, 2017-2020**

| Exposure                                    | No. pregnancies | No. cycles | Unadjusted |            | Adjusted <sup>a</sup> |            |
|---------------------------------------------|-----------------|------------|------------|------------|-----------------------|------------|
|                                             |                 |            | FR         | 95% CI     | FR                    | 95% CI     |
| Current e-cigarette user and current smoker | 25              | 200        | 0.70       | 0.46, 1.07 | 0.82                  | 0.52, 1.27 |
| Current e-cigarette user and former smoker  | 39              | 275        | 0.83       | 0.61, 1.13 | 0.92                  | 0.67, 1.25 |
| Current e-cigarette user and never smoker   | 22              | 149        | 0.79       | 0.51, 1.21 | 0.87                  | 0.57, 1.32 |
| Former e-cigarette user and current smoker  | 84              | 621        | 0.83       | 0.66, 1.04 | 0.98                  | 0.77, 1.24 |
| Former e-cigarette user and former smoker   | 83              | 569        | 0.81       | 0.65, 1.00 | 0.89                  | 0.72, 1.10 |
| Former e-cigarette user and never smoker    | 119             | 731        | 0.86       | 0.72, 1.02 | 0.89                  | 0.75, 1.07 |
| Never e-cigarette user and current smoker   | 109             | 644        | 0.94       | 0.78, 1.13 | 1.01                  | 0.83, 1.24 |
| Never e-cigarette user and former smoker    | 225             | 1269       | 0.99       | 0.87, 1.13 | 1.07                  | 0.94, 1.23 |
| Never e-cigarette user and never smoker     | 1898            | 10,031     | 1.00       | Referent   | 1.00                  | Referent   |

Abbreviations: CI, confidence interval; FR, fecundability ratio; No., number.

<sup>a</sup>Adjusted for age, annual household income, education, pack years smoked, weekly alcohol intake, intercourse frequency, doing anything to improve chances, body mass index, Major Depression Inventory score, multivitamin or supplement use, healthy eating index, parity.

**Web Table 2. Fecundability Ratios by Time-Varying E-Cigarette Use Stratified by Pregnancy Attempt Time at Study Entry, Pregnancy Study Online, United States and Canada, 2017-2020**

| Exposure                                                                                                                                                                                                                                                                                   | No. Pregnancies | No. Cycles | Unadjusted |            | Adjusted <sup>a</sup> |            |
|--------------------------------------------------------------------------------------------------------------------------------------------------------------------------------------------------------------------------------------------------------------------------------------------|-----------------|------------|------------|------------|-----------------------|------------|
|                                                                                                                                                                                                                                                                                            |                 |            | FR         | 95% CI     | FR                    | 95% CI     |
| <b>&lt;3 cycles of attempt time (n=3,027)</b>                                                                                                                                                                                                                                              |                 |            |            |            |                       |            |
| Never e-cigarette user                                                                                                                                                                                                                                                                     | 1,668           | 8,311      | 1.00       | Referent   | 1.00                  | Referent   |
| Ever e-cigarette user                                                                                                                                                                                                                                                                      | 242             | 1,594      | 0.78       | 0.68, 0.89 | 0.87                  | 0.76, 1.00 |
| Former e-cigarette user                                                                                                                                                                                                                                                                    | 194             | 1,201      | 0.81       | 0.70, 0.94 | 0.90                  | 0.78, 1.05 |
| Current e-cigarette user                                                                                                                                                                                                                                                                   | 48              | 393        | 0.66       | 0.49, 0.88 | 0.75                  | 0.56, 1.02 |
| <b>≥3 cycles of attempt time (n=1,559)</b>                                                                                                                                                                                                                                                 |                 |            |            |            |                       |            |
| Never e-cigarette user                                                                                                                                                                                                                                                                     | 564             | 3,633      | 1.00       | Referent   | 1.00                  | Referent   |
| Ever e-cigarette user                                                                                                                                                                                                                                                                      | 130             | 951        | 0.92       | 0.77, 1.11 | 0.93                  | 0.73, 1.17 |
| Former e-cigarette user                                                                                                                                                                                                                                                                    | 92              | 720        | 0.88       | 0.72, 1.08 | 0.89                  | 0.68, 1.15 |
| Current e-cigarette user                                                                                                                                                                                                                                                                   | 38              | 231        | 1.07       | 0.74, 1.54 | 1.04                  | 0.69, 1.57 |
| Abbreviations: CI, confidence interval; FR, fecundability ratio; No., number.                                                                                                                                                                                                              |                 |            |            |            |                       |            |
| <sup>a</sup> Adjusted for age, annual household income, education, baseline smoking status, pack-years of cigarette smoking, weekly alcohol intake, intercourse frequency, doing anything to improve chances, BMI, MDI score, multivitamin or supplement use, healthy eating index, parity |                 |            |            |            |                       |            |

**Web Table 3. Fecundability Ratios by Time-Varying E-Cigarette Use Stratified by Age at Baseline, Pregnancy Study Online, United States and Canada, 2017-2020**

| Exposure                                                                                                                                                                                                                                                                                                                      | No. Pregnancies | No. Cycles | Unadjusted |            | Adjusted <sup>a</sup> |            |
|-------------------------------------------------------------------------------------------------------------------------------------------------------------------------------------------------------------------------------------------------------------------------------------------------------------------------------|-----------------|------------|------------|------------|-----------------------|------------|
|                                                                                                                                                                                                                                                                                                                               |                 |            | FR         | 95% CI     | FR                    | 95% CI     |
| <b>&lt;30 years old (n=2,339)</b>                                                                                                                                                                                                                                                                                             |                 |            |            |            |                       |            |
| Never e-cigarette user                                                                                                                                                                                                                                                                                                        | 1,142           | 5,636      | 1.00       | Referent   | 1.00                  | Referent   |
| Ever e-cigarette user                                                                                                                                                                                                                                                                                                         | 201             | 1,398      | 0.76       | 0.66, 0.88 | 0.83                  | 0.70, 0.98 |
| Former e-cigarette user                                                                                                                                                                                                                                                                                                       | 155             | 1,069      | 0.77       | 0.65, 0.91 | 0.84                  | 0.69, 1.02 |
| Current e-cigarette user                                                                                                                                                                                                                                                                                                      | 46              | 329        | 0.71       | 0.51, 0.99 | 0.78                  | 0.55, 1.10 |
| <b>≥30 years old (n=2,247)</b>                                                                                                                                                                                                                                                                                                |                 |            |            |            |                       |            |
| Never e-cigarette user                                                                                                                                                                                                                                                                                                        | 1,090           | 6,308      | 1.00       | Referent   | 1.00                  | Referent   |
| Ever e-cigarette user                                                                                                                                                                                                                                                                                                         | 171             | 1,147      | 0.90       | 0.76, 1.06 | 0.92                  | 0.76, 1.12 |
| Former e-cigarette user                                                                                                                                                                                                                                                                                                       | 131             | 852        | 0.81       | 0.75, 1.10 | 0.93                  | 0.75, 1.16 |
| Current e-cigarette user                                                                                                                                                                                                                                                                                                      | 40              | 295        | 0.86       | 0.63, 1.17 | 0.89                  | 0.64, 1.25 |
| Abbreviations: CI, confidence interval; FR, fecundability ratio; No., number.                                                                                                                                                                                                                                                 |                 |            |            |            |                       |            |
| <sup>a</sup> Adjusted for age, annual household income, education, baseline smoking status, pack-years of cigarette smoking, weekly alcohol intake, intercourse frequency, doing anything to improve chances, body mass index, Major Depression Inventory score, multivitamin or supplement use, healthy eating index, parity |                 |            |            |            |                       |            |

**Web Table 4. Fecundability Ratios by Baseline and Time-Varying E-Cigarette Use Excluding Zero-Nicotine E-Cigarette Users, Pregnancy Study Online, United States and Canada, 2017-2020**

| Exposure                                                                                                                                                                                                                                                                                                                      | No. Pregnancies | No. Cycles | Unadjusted |            | Adjusted <sup>a</sup> |            |
|-------------------------------------------------------------------------------------------------------------------------------------------------------------------------------------------------------------------------------------------------------------------------------------------------------------------------------|-----------------|------------|------------|------------|-----------------------|------------|
|                                                                                                                                                                                                                                                                                                                               |                 |            | FR         | 95% CI     | FR                    | 95% CI     |
| <b>Baseline e-cigarette use</b>                                                                                                                                                                                                                                                                                               |                 |            |            |            |                       |            |
| Never e-cigarette user                                                                                                                                                                                                                                                                                                        | 2,238           | 11,997     | 1.00       | Referent   | 1.00                  | Referent   |
| Ever e-cigarette user                                                                                                                                                                                                                                                                                                         | 352             | 2,396      | 0.82       | 0.74, 0.92 | 0.88                  | 0.79, 0.99 |
| Former e-cigarette user                                                                                                                                                                                                                                                                                                       | 289             | 1,945      | 0.83       | 0.74, 0.93 | 0.89                  | 0.78, 1.01 |
| Current e-cigarette user                                                                                                                                                                                                                                                                                                      | 63              | 451        | 0.80       | 0.63, 1.00 | 0.85                  | 0.67, 1.08 |
| mL liquid/day <sup>b</sup>                                                                                                                                                                                                                                                                                                    |                 |            |            |            |                       |            |
| <3 mL                                                                                                                                                                                                                                                                                                                         | 28              | 197        | 0.78       | 0.55, 1.11 | 0.83                  | 0.58, 1.18 |
| ≥3 mL                                                                                                                                                                                                                                                                                                                         | 35              | 254        | 0.80       | 0.59, 1.09 | 0.85                  | 0.62, 1.16 |
| <b>Time-varying e-cigarette use</b>                                                                                                                                                                                                                                                                                           |                 |            |            |            |                       |            |
| Never e-cigarette user                                                                                                                                                                                                                                                                                                        | 2,232           | 11,944     | 1.00       | Referent   | 1.00                  | Referent   |
| Ever e-cigarette user                                                                                                                                                                                                                                                                                                         | 358             | 2,449      | 0.83       | 0.74, 0.92 | 0.88                  | 0.79, 0.99 |
| Former e-cigarette user                                                                                                                                                                                                                                                                                                       | 286             | 1,893      | 0.84       | 0.75, 0.94 | 0.90                  | 0.79, 1.01 |
| Current e-cigarette user                                                                                                                                                                                                                                                                                                      | 72              | 556        | 0.78       | 0.62, 0.97 | 0.83                  | 0.66, 1.04 |
| Abbreviations: CI, confidence interval; FR, fecundability ratio; mL, Milliliter; No., number.                                                                                                                                                                                                                                 |                 |            |            |            |                       |            |
| <sup>a</sup> Adjusted for age, annual household income, education, baseline smoking status, pack-years of cigarette smoking, weekly alcohol intake, intercourse frequency, doing anything to improve chances, body mass index, Major Depression Inventory score, multivitamin or supplement use, healthy eating index, parity |                 |            |            |            |                       |            |
| <sup>b</sup> Question on mL liquid/day only asked on baseline questionnaire.                                                                                                                                                                                                                                                  |                 |            |            |            |                       |            |

**Web Table 5. Fecundability Ratios by Time-Varying E-Cigarette Use Including only Viable Pregnancies, Pregnancy Study Online, United States and Canada, 2017-2020**

| Exposure                 | No. Pregnancies | No. Cycles | Unadjusted |            | Adjusted <sup>a</sup> |            |
|--------------------------|-----------------|------------|------------|------------|-----------------------|------------|
|                          |                 |            | FR         | 95% CI     | FR                    | 95% CI     |
| Never e-cigarette user   | 1,940           | 11,944     | 1.00       | Referent   | 1.00                  | Referent   |
| Ever e-cigarette user    | 323             | 2,545      | 0.83       | 0.74, 0.93 | 0.88                  | 0.78, 1.00 |
| Former e-cigarette user  | 247             | 1,921      | 0.83       | 0.73, 0.95 | 0.88                  | 0.77, 1.01 |
| Current e-cigarette user | 76              | 624        | 0.80       | 0.64, 1.01 | 0.87                  | 0.68, 1.10 |

Abbreviations: CI, confidence interval; FR, fecundability ratio; No., number.  
<sup>a</sup>Adjusted for age, annual household income, education, baseline smoking status, pack-years of cigarette smoking, weekly alcohol intake, intercourse frequency, doing anything to improve chances, body mass index, Major Depression Inventory score, multivitamin or supplement use, healthy eating index, parity
